# Supplementary material
Source: MDPI journal article supplement (https://www.mdpi.com/2311-7524/8/2/158)
Supplement: s1 [file s1]

**Table S1.** Specific Primer used for PCR and qRT-PCR.

| Gene name       | Forward                        | Reverse                      |
|-----------------|--------------------------------|------------------------------|
| CpARF7-clone    | ATGAAGGCTCCTTCAAATGGGTTTT      | TTACCGATTAAATGAAGCTGCAGAG    |
| qPCR-CpARF7     | CCAGCAGAACTACGCACTCCCTA        | CCTGAGAATCATATCCCCTTGACA     |
| SIIAA1          | TGAATCTAAGTCAAGTTCTGATCATGTC   | ATGATGTTTTTCCTGTTAGATCTCACTG |
| SIIAA2          | TAACAATGATGAACCACCAC           | TTTCCTTAAATAAGCCGCAC         |
| SIIAA3          | ATATAATGGATCTGATTATGCACCAACA   | TTATAAACATCTCCCATGGTACATCAC  |
| SIIAA4          | AACAAGAGGGCTTTGCCTGAG          | GTGTCTTGGCAACAGGTGGA         |
| SIIAA7          | ACTCAACCTCCATCATAATGATAATATTCC | ACCCACCACTTGAGCCTTA          |
| SIIAA8          | ATTCTGCTACTTTGATAATCTTGCACA    | TGTCCATTGATGAAACACAGCTCT     |
| SIIAA9          | CCCCTTGCACCCTTCCA              | AGCGTCTGAAAATCCTCGTTTG       |
| SIIAA11         | GGAGATGTTCTTCAAATCAACC         | TCTGATGATCCATCCAAGAG         |
| SIIAA12         | CCACGCGATCTTCAGCATAA           | TCTGTTTCAGGGAGCGGC           |
| SIIAA13         | AGTCTTTTAAGCTCTTGGATGGATCA     | AAACATCCCGAATGGAACATCT       |
| SIIAA14         | GTTTACGCATAATGAAAGGATCAGAAG    | TTATCTATGGAGCTTGCACACCA      |
| SIIAA15         | CCTAACAATCTGTAATTCTCAAAGTGAAA  | GCATCCAGTCTCCATCTTTATCTTC    |
| SIIAA16         | GCGTGTGGGTGCGGA                | CGATTCCAGTTCATTCCCATTAG      |
| SIIAA17         | CAAGAATTATTTGATGCCTTAACCAA     | ACTATTCAAAAGGTCCATCAGTTTCC   |
| SIIAA19         | TGTCGCGATGTTCCATG              | AAGTCTCTTGCTCCAAGCCCTAT      |
| SIIAA26         | AAAGGCTGCGTGTGTTGAAA           | CAAGATCTGTTGGCTCTACATCTTGT   |
| SIIAA27         | CCAAAAAGAGGGAATGGAGGTT         | TGTTCTCCCTTCATCATCATTTTTC    |
| SIIAA29         | GGTTTGTATGATAGCTTCTCCGATA      | ACGTCTTACGTTCAACTACTCCTTCA   |
| SIIAA30         | AGAAATTCATGTATGTGAAGGTTAAAA    | CATTGGAGCAAAGTGTTAGTAAGGA    |
| Sl-EF1 $\alpha$ | TACTGGTGGTTTTGAAGCTG           | AACTTCCTTCACGATTTCATCATA     |
